# Supplementary material for: Comparison of histomorphology and DNA preservation produced by fixatives in the veterinary diagnostic laboratory setting
Source: PeerJ. 2014 May 6;2:e377. doi: 10.7717/peerj.377 (PMC4017885; doi:10.7717/peerj.377)
Supplement: Supplemental Information 1 [file peerj-02-377-s001.xlsx]

## Sheet: Raw
Dog 1		100	200	300	500	750		Number of Bands			Largest Band
Fix A
Lung		X	X	X	X			4			500				Lung	410	219.089
Kidney		X	X	X				3			300				Kidney	400	109.545
Liver		X	X	X	X			4			500			Fix	Liver	400	109.545
Lymph Node		X	X					2			200			A	Lymph Node	240	89.4427
Spleen		X	X	X				3			300				Spleen	375	183.712
Brain		X	X	X	X			4			500				Brain	400	109.545
Fix B
Lung		X	X	X	X			4			500				Lung	441.667	180.046
Kidney		X	X	X	X			4			500				Kidney	470	185.742
Liver			X	X	X			3			500			Fix	Liver	508.333	142.887
Lymph Node			X	X	X			3			500			B	Lymph Node	433.333	103.28
Spleen		X	X	X	X			4			500				Spleen	433.333	103.28
Brain		X	X	X				3			300				Brain	400	109.545
Fix C
Lung		X	X	X	X			4			500				Lung	541.667	292.261
Kidney		X	X	X	X			4			500				Kidney	666.667	129.099
Liver		X	X	X				3			300			Fix	Liver	558.333	222.299
Lymph Node		X	X	X	X			4			500			C	Lymph Node	666.667	129.099
Spleen		X	X	X	X	X		5			750				Spleen	666.667	129.099
Brain		X	X	X		X		4			750				Brain	750	0
Fix D
Lung		X	X	X	X	X		5			750				Lung	558.333	222.299
Kidney		X	X	X	X			4			500				Kidney	666.667	129.099
Liver			X	X				2			300			Fix	Liver	333.333	81.6497
Lymph Node		X	X	X				3			300			D	Lymph Node	441.667	220.038
Spleen		X	X	X		X		4			750				Spleen	508.333	142.887
Brain		X	X	X	X			4			500				Brain	708.333	102.062
Dog 2		100	200	300	500	750		Number of Bands			Largest Band				Lung	500	300	750		200	300
Fix A															Kidney	300	500	500	500	300	300
Lung		X	X	X				3			300			Fix	Liver	500	300	500	500	300	500
Kidney		X	X	X	X			4			500			a	Lymph Node	200	300	300		300	100
Liver		X	X	X				3			300				Spleen	300	300	750	300	300	300
Lymph Node		X	X	X				3			300				Brain
Spleen		X	X	X				3			300
Brain		X	X	X	X			4			500
Fix B
Lung		X	X	X				3			300
Kidney		X	X	X				3			300
Liver		X	X	X	X			4			500
Lymph Node		X	X	X	X			4			500
Spleen		X	X		X			3			500
Brain		X	X	X				3			300
Fix C
Lung		X	X	X	X			4			500
Kidney		X	X	X	X			4			500
Liver		X	X	X	X			4			500
Lymph Node		X	X	X	X			4			500
Spleen		X	X	X	X			4			500
Brain		X	X	X	X	X		5			750
		100	200	300	500	750		Number of Bands			Largest Band
Fix D
Lung		X	X	X				3			300
Kidney		X	X	X	X			4			500
Liver		X	X	X	X			4			500
Lymph Node		X	X	X	X			4			500
Spleen								0			500
Brain		X	X	X	X	X		4			750
Cat 1		100	200	300	500	750		Number of Bands			Largest Band
Fix A
Lung		x	x	x		x		4			750
Kidney		X	X	X	X			4			500
Liver		X	X	X	X			4			500
Lymph Node		X	X	X				3			300
Spleen		X	X	X	X	X		5			750
Brain		X	X	X				3			300
Fix B
Lung		X	X	X				3			300
Kidney		X	X	X	X			4			500
Liver		X	X	X		X		4			750
Lymph Node		X		X	X			3			500
Spleen		X	X	X	X			4			500
Brain		X	X	X	X			4			500
Fix C
Lung		X	X	X	X	X		5			750
Kidney		X	X	X	X	X		5			750
Liver		X	X	X	X	X		5			750
Lymph Node		X	X	X		X		4			750
Spleen		X		X	X	X		4			750
Brain		X		X	X	X		4			750
Fix D
Lung		X	X	X	X	X		5			750
Kidney		X	X	X	X	X		5			750
Liver		X		X				2			300
Lymph Node		X	X	X	X			4			500
Spleen		X	X	X	X			4			500
Brain		X	X	X	X	X		5			750
Cat 2		100	200	300	500	750		Number of Bands			Largest Band
Fix A
Lung		Did not have sample
Kidney		x	x	x	x			4			500
Liver		x		x	x			3			500
Lymph Node		Did not have sample
Spleen		x		x				2			300
Brain		x	x	x	x			4			500
Fix B
Lung		x	x	x	x	x		5			750
Kidney		Did not have sample
Liver		x	x	x	x			4			500
Lymph Node		x	x	x	x			4			500
Spleen		X	X	X				3			300
Brain		X	X	X	X			4			500
		100	200	300	500	750		Number of Bands			Largest Band
Fix C
Lung		X	X	X	X	X		5			750
Kidney		X	X	X	X	X		5			750
Liver		X	X	X	X	X		5			750
Lymph Node		X	X	X		X		4			750
Spleen		X		X	X	X		4			750
Brain		X		X	X	X		4			750
Fix D
Lung		X		X		X		3			750
Kidney		X	X	X	X	X		4			750
Liver		X		X				2			300
Lymph Node		X	X	X	X			4			500
Spleen		X	X	X	X			4			500
Brain		X	X	X	X	X		5			750
Cat 3		100	200	300	500	750		Number of Bands			Largest Band
Fix A
Lung		X	X					2			200
Kidney		X	X	X				3			300
Liver		X	X	X				3			300
Lymph Node		X	X	X				3			300
Spleen		X	X	X				3			300
Brain		X	X	X				3			300
Fix B
Lung		X	X	X				3			300
Kidney		X	X	X				3			300
Liver		X		X				2			300
Lymph Node		X	X	X				3			300
Spleen		X	X	X				3			300
Brain		X	X	X				3			300
		100	200	300	500	750		Number of Bands			Largest Band
Fix C
Lung		X		X	X	X		4			750
Kidney		X	X	X	X	X		5			750
Liver		X	X	X				3			750
Lymph Node		X	X	X	X	X		5			750
Spleen		X	X	X	X	X		5			750
Brain		X		X	X	X		4			750
Fix D
Lung		X		X	X			3			500
Kidney		X	X	X	X	X		5			750
Liver		X	X	X				3			300
Lymph Node		X	X	X	X	X		5			750
Spleen		X	X	X	X			4			500
Brain		X	X	X	X	X		5			750
Cat 4		100	200	300	500	750		Number of Bands			Largest Band
Fix A
Lung		X		X				2			300
Kidney		X		X				2			300
Liver		X		X				2			300
Lymph Node		X						1			100
Spleen		X		X				2			300
Brain		X	X	X				2			300
Fix B
Lung		X	X	X	X			4			500
Kidney		X	X	X	X	X		5			750
Liver		X		X	X			3			500
Lymph Node		X		X				2			300
Spleen		X	X	X	X			4			500
Brain		X	X	X	X			4			500
Fix C
Lung								0			0
Kidney		X		X		X		3			750
Liver		X		X				2			300
Lymph Node		X	X	X	X	X		5			750
Spleen		X		X	X			3			500
Brain		X	X	X	X	X		5			750
Fix D
Lung		X		X				2			300
Kidney		X		X	X	X		4			750
Liver		X		X				2			300
Lymph Node		X						1			100
Spleen		X		X				2			300
Brain		X		X	X	X		4			750

## Sheet: Collation + Stats
500	500	500	750													SD
300	500	500	500					Formalin	500	300	750		200	300		219.089
500	500	300	300				Lung	UMFIX	500	300	300	750	300	500		180.046
200	500	500	300					Methacarn	500	500	750	750	750	0		292.261
300	500	750	750					PAXgene	750	300	750	750	500	300		222.299
500	300	750	500
300	300	500	300
500	300	500	500					Formalin	300	500	500	500	300	300		109.545
300	500	500	500				Kidney	UMFIX	500	300	500		300	750		185.742
300	500	500	500					Methacarn	500	500	750	750	750	750		129.099			1	7	13	19	25	31
300	500	500	500					PAXgene	500	500	750	750	750	750		129.099			2	8	14	20	26	32
500	300	750	750																3	9	15	21	27	33
750	300	750	750					Formalin	500	300	500	500	300	300		109.545			4	10	16	22	28	34
500	500	750	750				Liver	UMFIX	500	500	750	500	300	500		142.887			5	11	17	23	29	35
500	750	750	300					Methacarn	300	500	750	750	750	300		222.299			6	12	18	24	30	36
300	500	750	500					PAXgene	300	500	300	300	300	300		81.6497
750	500	750	500
300	500	750	750					Formalin	200	300	300		300	100		89.4427
	750	750	750				LN	UMFIX	500	500	500	500	300	300		103.28
500		750	750					Methacarn	500	500	750	750	750	750		129.099
500	500	750	300					PAXgene	300	500	500	500	750	100		220.038
	500	750	500
300	300	750	500					Formalin	300	300	750	300	300	300		183.712
500	500	750	750				Spleen	UMFIX	500	500	500	300	300	500		103.28
200	300	750	500					Methacarn	750	500	750	750	750	500		129.099
300	300	750	750					PAXgene	750	500	500	500	500	300		142.887
300	300	750	300
300	300	750	750					Formalin	500	500	300	500	300	300		109.545
300	300	750	500				Brain	UMFIX	300	300	500	500	300	500		109.545
300	300	750	750					Methacarn	750	750	750	750	750	750		0
300	500	0	300					PAXgene	500	750	750	750	750	750		102.062
300	750	750	750
300	500	300	300					Formalin	500	300	750		200	300	300	500	500	500	300	300	500	300	500	500	300	300	200	300	300		300	100	300	300	750	300	300	300	500	500	300	500	300	300
100	300	750	100				Average	UMFIX	500	300	300	750	300	500	500	300	500		300	750	500	500	750	500	300	500	500	500	500	500	300	300	500	500	500	300	300	500	300	300	500	500	300	500
300	500	500	300					Methacarn	500	500	750	750	750	0	500	500	750	750	750	750	300	500	750	750	750	300	500	500	750	750	750	750	750	500	750	750	750	500	750	750	750	750	750	750
300	500	750	750					PAXgene	750	300	750	750	500	300	500	500	750	750	750	750	300	500	300	300	300	300	300	500	500	500	750	100	750	500	500	500	500	300	500	750	750	750	750	750
								Formalin	373.529	143.672
							Average	UMFIX	447.143	133.913
								Methacarn	641.667	177.884
								PAXgene	536.111	196.255
