# Supplementary material for: Comparison of histomorphology and DNA preservation produced by fixatives in the veterinary diagnostic laboratory setting
Source: PeerJ. 2014 May 6;2:e377. doi: 10.7717/peerj.377 (PMC4017885; doi:10.7717/peerj.377)
Supplement: Supplemental Information 2 [file peerj-02-377-s002.xls]

## Sheet: A
Animal	Fixative	Tissue	Nuclear	Cytoplasm	Cell Membrane	Sum	Notes
Dog 1	A	Liver	4	3	4	11
Dog 1	A	Spleen	4	4	4	12
Dog 1	A	Lymph Node	4	4	4	12
Dog 1	A	Kidney	4	3	2	9
Dog 1	A	Brain	3	3	3	9
Dog 1	A	Lung	4	4	3	11
Dog 1	B	Liver	4	3	4	11	RBC central lysis
Dog 1	B	Spleen	3	3	4	10
Dog 1	B	Lymph Node	4	3	4	11	RBC central lysis
Dog 1	B	Kidney	4	3	2	9	RBC central lysis
Dog 1	B	Brain	3	2	3	8	RBC central lysis
Dog 1	B	Lung	3	2	3	8	RBC central lysis
Dog 1	C	Liver	4	2	4	10	Severe acid hematin granules
Dog 1	C	Spleen	4	3	4	11	Severe acid hematin granules
Dog 1	C	Lymph Node	4	3	3	10	RBC central lysis
Dog 1	C	Kidney	3	3	2	8	RBC central lysis
Dog 1	C	Brain	3	3	3	9	Holes, RBC central lysis
Dog 1	C	Lung	3	2	2	7	RBC central lysis
Dog 1	D	Liver	4	2	3	9	RBC central lysis
Dog 1	D	Spleen	3	3	3	9	RBC central lysis
Dog 1	D	Lymph Node	3	2	3	8
Dog 1	D	Kidney	3	3	2	8	RBC central lysis
Dog 1	D	Brain	2	2	3	7	RBC central lysis
Dog 1	D	Lung	3	2	3	8	RBC central lysis
Dog 2	A	Liver	4	3	2	9	RBC central lysis
Dog 2	A	Spleen	3	3	3	9
Dog 2	A	Lymph Node	3	3	3	9
Dog 2	A	Kidney	3	3	2	8
Dog 2	A	Brain	3	3	3	9
Dog 2	A	Lung	4	3	4	11
Dog 2	B	Liver	2	3	3	8	RBC central lysis
Dog 2	B	Spleen	3	3	3	9	RBC central lysis
Dog 2	B	Lymph Node	3	3	3	9
Dog 2	B	Kidney	3	3	2	8	RBC central lysis
Dog 2	B	Brain	2	2	2	6
Dog 2	B	Lung	3	3	4	10	RBC central lysis, individualization of bronchiolar epithelial cells
Dog 2	C	Liver	4	3	3	10	RBC central lysis, acid hematin formation
Dog 2	C	Spleen	3	3	3	9	RBC central lysis, acid hematin formation
Dog 2	C	Lymph Node	4	3	3	10	RBC central lysis
Dog 2	C	Kidney	4	3	3	10	RBC central lysis
Dog 2	C	Brain	3	3	3	9	RBC central lysis
Dog 2	C	Lung	4	1	0	5	RBC central lysis
Dog 2	D	Liver	3	3	2	8	RBC central lysis
Dog 2	D	Spleen	3	3	2	8	RBC central lysis
Dog 2	D	Lymph Node	3	2	2	7	RBC central lysis
Dog 2	D	Kidney	3	2	3	8	RBC central lysis
Dog 2	D	Brain	3	2	2	7	RBC central lysis
Dog 2	D	Lung	3	2	2	7	RBC central lysis
Cat 1	A	Liver	4	4	4	12
Cat 1	A	Spleen	4	4	4	12
Cat 1	A	Lymph Node	4	4	4	12
Cat 1	A	Kidney	4	3	4	11
Cat 1	A	Brain	4	4	4	12
Cat 1	A	Lung	4	4	4	12
Cat 1	B	Liver	4	3	4	11	RBC central lysis
Cat 1	B	Spleen	4	3	3	10	Patchy RBC lysis
Cat 1	B	Lymph Node	4	3	3	10
Cat 1	B	Kidney	4	3	3	10	Patchy RBC lysis
Cat 1	B	Brain	4	3	3	10	Holes
Cat 1	B	Lung	4	3	3	10	RBC central lysis
Cat 1	C	Liver	4	3	4	11	RBC central lysis
Cat 1	C	Spleen	4	3	3	10	RBC central lysis
Cat 1	C	Lymph Node	3	3	3	9	RBC central lysis
Cat 1	C	Kidney	4	3	2	9	RBC central lysis
Cat 1	C	Brain	3	3	2	8	RBC central lysis
Cat 1	C	Lung	3	3	3	9	RBC central lysis
Cat 1	D	Liver	4	3	3	10	RBC central lysis
Cat 1	D	Spleen	3	2	2	7	RBC central lysis
Cat 1	D	Lymph Node	3	3	3	9	RBC central lysis
Cat 1	D	Kidney	4	2	3	9	RBC central lysis
Cat 1	D	Brain	3	4	3	10	Holes, RBC central lysis
Cat 1	D	Lung	4	3	4	11	RBC central lysis
Cat 2	A	Liver	4	3	3	10
Cat 2	A	Spleen	4	3	3	10
Cat 2	A	Lymph Node	4	3	3	10
Cat 2	A	Kidney	3	3	2	8
Cat 2	A	Brain	3	3	3	9
Cat 2	A	Lung	4	4	3	11
Cat 2	B	Liver	4	4	4	12	RBC central lysis
Cat 2	B	Spleen	4	3	2	9	Patchy RBC lysis
Cat 2	B	Lymph Node	4	3	3	10	RBC central lysis
Cat 2	B	Kidney	4	3	3	10	RBC central lysis
Cat 2	B	Brain	4	3	3	10	RBC central lysis
Cat 2	B	Lung	3	3	4	10	RBC central lysis
Cat 2	C	Liver	4	3	3	10	RBC central lysis, acid hematin formation
Cat 2	C	Spleen	4	3	3	10	RBC central lysis, acid hematin formation
Cat 2	C	Lymph Node	4	3	3	10	RBC central lysis
Cat 2	C	Kidney	4	3	3	10	RBC central lysis
Cat 2	C	Brain	4	3	3	10	RBC central lysis
Cat 2	C	Lung	4	3	2	9	RBC central lysis
Cat 2	D	Liver	4	3	4	11	RBC central lysis
Cat 2	D	Spleen	3	2	2	7	RBC central lysis
Cat 2	D	Lymph Node	4	3	3	10	RBC central lysis
Cat 2	D	Kidney	4	3	3	10	RBC central lysis
Cat 2	D	Brain	4	3	3	10	RBC central lysis
Cat 2	D	Lung	4	4	4	12	RBC central lysis
Cat 3	A	Liver	4	3	4	11
Cat 3	A	Spleen	4	3	3	10	Holes
Cat 3	A	Lymph Node	0	0	0	0	Chipped out
Cat 3	A	Kidney	4	4	3	11
Cat 3	A	Brain	4	4	4	12
Cat 3	A	Lung	3	3	2	8
Cat 3	B	Liver	4	4	4	12	Patchy RBC lysis, holes
Cat 3	B	Spleen	4	3	3	10	Patchy central RBC lysis
Cat 3	B	Lymph Node	4	4	4	12	RBC central lysis
Cat 3	B	Kidney	3	3	3	9	RBC central lysis, holes
Cat 3	B	Brain	4	3	2	9	RBC central lysis
Cat 3	B	Lung	3	2	2	7	RBC central lysis
Cat 3	C	Liver	4	4	3	11	RBC central lysis
Cat 3	C	Spleen	4	3	3	10	RBC central lysis
Cat 3	C	Lymph Node	4	3	3	10	RBC central lysis
Cat 3	C	Kidney	3	2	2	7	RBC central lysis
Cat 3	C	Brain	3	2	2	7	RBC central lysis
Cat 3	C	Lung	2	2	2	6	RBC central lysis, acid hematin formation
Cat 3	D	Liver	3	3	4	10	RBC central lysis, center 50% chipped out
Cat 3	D	Spleen	4	3	3	10	RBC central lysis
Cat 3	D	Lymph Node	3	3	3	9
Cat 3	D	Kidney	3	3	3	9	RBC central lysis
Cat 3	D	Brain	3	3	2	8	RBC central lysis
Cat 3	D	Lung	2	2	2	6	RBC central lysis
Cat 4	A	Liver	4	3	2	9
Cat 4	A	Spleen	4	4	3	11
Cat 4	A	Lymph Node	4	4	3	11
Cat 4	A	Kidney	3	3	2	8
Cat 4	A	Brain	4	4	4	12
Cat 4	A	Lung	3	3	2	8	Holes
Cat 4	B	Liver	4	3	4	11	Patchy RBC lysis, holes
Cat 4	B	Spleen	4	3	3	10	RBC central lysis
Cat 4	B	Lymph Node	3	3	3	9	Holes
Cat 4	B	Kidney	3	4	4	11	RBC central lysis
Cat 4	B	Brain	3	3	2	8	RBC central lysis
Cat 4	B	Lung	4	2	2	8	RBC central lysis
Cat 4	C	Liver	4	4	3	11	RBC central lysis
Cat 4	C	Spleen	4	3	3	10	RBC central lysis
Cat 4	C	Lymph Node	4	3	3	10	RBC central lysis
Cat 4	C	Kidney	3	3	2	8	RBC central lysis
Cat 4	C	Brain	3	2	2	7	RBC central lysis
Cat 4	C	Lung	3	4	4	11	RBC central lysis
Cat 4	D	Liver	3	3	3	9	RBC central lysis, holes
Cat 4	D	Spleen	3	3	3	9	RBC central lysis
Cat 4	D	Lymph Node	3	3	3	9	RBC central lysis, holes
Cat 4	D	Kidney	3	3	2	8	RBC central lysis, holes
Cat 4	D	Brain	4	3	2	9	RBC central lysis, holes
Cat 4	D	Lung	3	3	4	10	RBC central lysis

## Sheet: B
Animal	Fixative	Tissue	Nuclear	Cytoplasm	Cell Membrane	Sum	Notes
Dog 1	A	Liver	4	4	4	12
Dog 1	A	Spleen	4	4	3	11
Dog 1	A	Lymph Node	4	4	4	12
Dog 1	A	Kidney	4	3	3	10
Dog 1	A	Brain	3	3	3	9
Dog 1	A	Lung	4	4	3	11
Dog 1	B	Liver	3	3	3	9	ghosting of rbc's in all fixative B sections
Dog 1	B	Spleen	3	3	3	9
Dog 1	B	Lymph Node	3	3	3	9
Dog 1	B	Kidney	4	3	3	10
Dog 1	B	Brain	2	3	2	7	few holes in section
Dog 1	B	Lung	3	2	2	7
Dog 1	C	Liver	4	3	4	11	ghosting of rbc's in all fixative C sections. Acid hematin
Dog 1	C	Spleen	4	2	2	8	acid hematin
Dog 1	C	Lymph Node	4	3	3	10	chatter
Dog 1	C	Kidney	3	3	2	8
Dog 1	C	Brain	3	2	2	7	chatter
Dog 1	C	Lung	3	2	2	7
Dog 1	D	Liver	4	3	3	10	ghosting of rbc's in all fixative D sections. Chatter
Dog 1	D	Spleen	3	2	2	7
Dog 1	D	Lymph Node	4	3	3	10
Dog 1	D	Kidney	4	3	4	11
Dog 1	D	Brain	3	2	2	7
Dog 1	D	Lung	4	3	3	10
Dog 2	A	Liver	4	3	3	10	chatter
Dog 2	A	Spleen	4	4	4	12
Dog 2	A	Lymph Node	4	3	4	11	chatter
Dog 2	A	Kidney	4	4	3	11
Dog 2	A	Brain	4	3	3	10
Dog 2	A	Lung	4	3	3	10
Dog 2	B	Liver	4	3	4	11	ghosting of rbc's in all fixative B sections
Dog 2	B	Spleen	3	3	3	9
Dog 2	B	Lymph Node	3	3	4	10
Dog 2	B	Kidney	4	4	3	11
Dog 2	B	Brain	3	3	3	9
Dog 2	B	Lung	4	3	4	11
Dog 2	C	Liver	4	3	4	11	ghosting of rbc's in all fixative D sections. Acid hematin
Dog 2	C	Spleen	4	3	3	10	Acid hematin
Dog 2	C	Lymph Node	3	3	3	9
Dog 2	C	Kidney	3	3	3	9
Dog 2	C	Brain	3	2	2	7
Dog 2	C	Lung	3	2	2	7
Dog 2	D	Liver	3	3	3	9	ghosting of rbc's in all fixative D sections.
Dog 2	D	Spleen	3	2	2	7
Dog 2	D	Lymph Node	3	2	3	8	chatter
Dog 2	D	Kidney	3	3	2	8
Dog 2	D	Brain	3	3	3	9
Dog 2	D	Lung	3	3	2	8
Cat 1	A	Liver	4	4	4	12
Cat 1	A	Spleen	4	4	4	12
Cat 1	A	Lymph Node	4	4	4	12
Cat 1	A	Kidney	4	4	3	11
Cat 1	A	Brain	4	3	3	10
Cat 1	A	Lung	4	4	4	12
Cat 1	B	Liver	4	3	4	11	ghosting of rbc's in all fixative B sections
Cat 1	B	Spleen	4	3	3	10	holes
Cat 1	B	Lymph Node	4	3	3	10
Cat 1	B	Kidney	4	3	3	10
Cat 1	B	Brain	4	3	2	9	chatter
Cat 1	B	Lung	4	3	4	11
Cat 1	C	Liver	4	3	4	11	ghosting of rbc's in all fixative C sections
Cat 1	C	Spleen	4	3	3	10
Cat 1	C	Lymph Node	4	3	3	10
Cat 1	C	Kidney	3	3	2	8
Cat 1	C	Brain	4	3	3	10	chatter
Cat 1	C	Lung	4	4	4	12
Cat 1	D	Liver	4	4	4	12	ghosting of rbc's in all fixative D sections
Cat 1	D	Spleen	4	3	4	11	chatter
Cat 1	D	Lymph Node	4	3	3	10
Cat 1	D	Kidney	4	3	3	10
Cat 1	D	Brain	3	3	3	9	chatter
Cat 1	D	Lung	4	4	4	12
Cat 2	A	Liver	4	4	4	12
Cat 2	A	Spleen	4	4	4	12
Cat 2	A	Lymph Node	4	4	4	12
Cat 2	A	Kidney	4	3	3	10
Cat 2	A	Brain	4	3	3	10	stain precipitate
Cat 2	A	Lung	4	4	4	12
Cat 2	B	Liver	4	3	4	11	ghosting of rbc's in all fixative B sections/patchy staining of rbc's
Cat 2	B	Spleen	3	3	3	9	holes
Cat 2	B	Lymph Node	4	3	3	10
Cat 2	B	Kidney	4	3	3	10
Cat 2	B	Brain	4	3	3	10	chatter
Cat 2	B	Lung	3	3	4	10
Cat 2	C	Liver	4	3	4	11	ghosting of rbc's in all fixative C sections. Acid hematin
Cat 2	C	Spleen	3	3	3	9	acid hematin
Cat 2	C	Lymph Node	4	3	3	10
Cat 2	C	Kidney	4	3	3	10
Cat 2	C	Brain	4	3	3	10
Cat 2	C	Lung	4	4	3	11
Cat 2	D	Liver	4	3	3	10	ghosting of rbc's in all fixative D sections
Cat 2	D	Spleen	3	3	3	9
Cat 2	D	Lymph Node	4	3	3	10
Cat 2	D	Kidney	4	3	3	10
Cat 2	D	Brain	4	3	3	10
Cat 2	D	Lung	4	4	4	12
Cat 3	A	Liver	4	4	4	12
Cat 3	A	Spleen	4	4	4	12
Cat 3	A	Lymph Node				0	no lymph node
Cat 3	A	Kidney	4	4	3	11
Cat 3	A	Brain	4	3	3	10
Cat 3	A	Lung	3	2	2	7
Cat 3	B	Liver	4	3	4	11	ghosting of rbc's in all fixative B sections Chatter
Cat 3	B	Spleen	3	3	3	9	chatter
Cat 3	B	Lymph Node	4	3	3	10
Cat 3	B	Kidney	4	4	3	11	chatter
Cat 3	B	Brain	3	3	3	9
Cat 3	B	Lung	2	2	2	6
Cat 3	C	Liver	4	4	4	12	ghosting of rbc's in all fixative C sections. Chatter
Cat 3	C	Spleen	4	3	3	10	chatter acid hematin
Cat 3	C	Lymph Node	4	3	3	10
Cat 3	C	Kidney	4	3	3	10	chatter
Cat 3	C	Brain	4	3	3	10	chatter
Cat 3	C	Lung	3	2	2	7	acid hematin
Cat 3	D	Liver	4	3	3	10	ghosting of rbc's in all fixative D sections holes in liver section
Cat 3	D	Spleen	4	3	3	10
Cat 3	D	Lymph Node	4	3	3	10
Cat 3	D	Kidney	4	3	3	10
Cat 3	D	Brain	3	3	3	9
Cat 3	D	Lung	2	2	2	6
Cat 4	A	Liver	4	4	4	12	chatter
Cat 4	A	Spleen	3	3	3	9	chatter
Cat 4	A	Lymph Node	3	3	3	9	chatter
Cat 4	A	Kidney	3	3	3	9	chatter
Cat 4	A	Brain	4	3	3	10	staining abnormalities
Cat 4	A	Lung	4	3	3	10	hole
Cat 4	B	Liver	4	3	4	11	ghosting of rbc's in all fixative B sections chatter
Cat 4	B	Spleen	3	3	3	9
Cat 4	B	Lymph Node	4	3	3	10	chatter
Cat 4	B	Kidney	4	4	3	11
Cat 4	B	Brain	3	3	3	9
Cat 4	B	Lung	2	2	2	6
Cat 4	C	Liver	4	4	4	12	ghosting of rbc's in all fixative C sections
Cat 4	C	Spleen	3	3	3	9	acid hematin chatter
Cat 4	C	Lymph Node	3	3	3	9
Cat 4	C	Kidney	3	3	3	9
Cat 4	C	Brain	3	3	3	9
Cat 4	C	Lung	2	2	2	6
Cat 4	D	Liver	4	3	3	10	ghosting of rbc's in all fixative D sections chatter
Cat 4	D	Spleen	4	3	3	10
Cat 4	D	Lymph Node	3	3	3	9	chatter
Cat 4	D	Kidney	3	3	3	9	chatter
Cat 4	D	Brain	3	3	3	9
Cat 4	D	Lung	3	3	3	9	acid hematin

## Sheet: C
Animal	Fixative	Tissue	Nuclear	Cytoplasm	Cell Membrane	Sum	Notes
Dog 1	A	Liver	4	4	4	12
Dog 1	A	Spleen	4	4	4	12
Dog 1	A	Lymph Node	4	4	4	12
Dog 1	A	Kidney	4	4	4	12
Dog 1	A	Brain	4	4	4	12
Dog 1	A	Lung	4	4	4	12
Dog 1	B	Liver	3	1	2	6
Dog 1	B	Spleen	4	1	2	7
Dog 1	B	Lymph Node	4	3	2	9
Dog 1	B	Kidney	4	2	2	8
Dog 1	B	Brain	4	3	3	10
Dog 1	B	Lung	4	1	1	6
Dog 1	C	Liver	3	2	2	7	4+ acid hematin
Dog 1	C	Spleen	3	2	2	7	4+ acid hematin
Dog 1	C	Lymph Node	3	3	3	9
Dog 1	C	Kidney	2	2	2	6
Dog 1	C	Brain	3	2	2	7	Punched out holes
Dog 1	C	Lung	3	2	1	6
Dog 1	D	Liver	3	2	2	7
Dog 1	D	Spleen	3	3	2	8
Dog 1	D	Lymph Node	3	3	3	9
Dog 1	D	Kidney	3	2	3	8
Dog 1	D	Brain	3	3	3	9
Dog 1	D	Lung	3	2	1	6
Dog 2	A	Liver	4	4	3	11
Dog 2	A	Spleen	4	4	4	12
Dog 2	A	Lymph Node	4	4	4	12
Dog 2	A	Kidney	4	4	4	12
Dog 2	A	Brain	4	4	4	12
Dog 2	A	Lung	4	4	3	11
Dog 2	B	Liver	3	2	2	7
Dog 2	B	Spleen	3	3	3	9
Dog 2	B	Lymph Node	3	4	3	10
Dog 2	B	Kidney	3	3	3	9
Dog 2	B	Brain	3	3	2	8
Dog 2	B	Lung	3	3	2	8
Dog 2	C	Liver	3	3	3	9	4+ acid hematin
Dog 2	C	Spleen	3	3	3	9	4+ acid hematin, poorly fixed
Dog 2	C	Lymph Node	3	3	3	9
Dog 2	C	Kidney	3	3	3	9
Dog 2	C	Brain	3	3	3	9
Dog 2	C	Lung	3	2	2	7	Very bloody, not well fixed
Dog 2	D	Liver	3	3	3	9
Dog 2	D	Spleen	3	2	3	8	Bloody, unfixed
Dog 2	D	Lymph Node	4	4	3	11
Dog 2	D	Kidney	4	3	4	11
Dog 2	D	Brain	4	3	3	10
Dog 2	D	Lung	3	2	2	7
Cat 1	A	Liver	4	3	4	11
Cat 1	A	Spleen	4	3	4	11
Cat 1	A	Lymph Node	4	3	4	11
Cat 1	A	Kidney	4	3	4	11
Cat 1	A	Brain	4	3	4	11
Cat 1	A	Lung	4	3	4	11
Cat 1	B	Liver	3	3	3	9
Cat 1	B	Spleen	3	2	2	7
Cat 1	B	Lymph Node	3	2	2	7
Cat 1	B	Kidney	3	3	2	8
Cat 1	B	Brain	3	3	3	9	Punched out holes
Cat 1	B	Lung	2	2	2	6
Cat 1	C	Liver	3	2	3	8
Cat 1	C	Spleen	3	2	2	7
Cat 1	C	Lymph Node	3	2	2	7
Cat 1	C	Kidney	3	2	3	8
Cat 1	C	Brain	3	3	3	9
Cat 1	C	Lung	3	2	3	8
Cat 1	D	Liver	3	2	2	7
Cat 1	D	Spleen	3	2	2	7
Cat 1	D	Lymph Node	3	2	2	7
Cat 1	D	Kidney	3	2	2	7
Cat 1	D	Brain	3	2	2	7
Cat 1	D	Lung	3	2	3	8
Cat 2	A	Liver	3	3	3	9
Cat 2	A	Spleen	3	3	3	9
Cat 2	A	Lymph Node	3	3	3	9
Cat 2	A	Kidney	3	2	2	7
Cat 2	A	Brain	4	3	3	10
Cat 2	A	Lung	4	3	4	11
Cat 2	B	Liver	3	2	3	8
Cat 2	B	Spleen	3	2	2	7
Cat 2	B	Lymph Node	3	2	2	7
Cat 2	B	Kidney	3	2	2	7
Cat 2	B	Brain	3	3	3	9
Cat 2	B	Lung	3	2	3	8
Cat 2	C	Liver	3	2	3	8	3+ acid hematin
Cat 2	C	Spleen	3	2	2	7	3+ acid hematin
Cat 2	C	Lymph Node	3	2	2	7
Cat 2	C	Kidney	3	2	3	8
Cat 2	C	Brain	3	3	3	9
Cat 2	C	Lung	3	3	4	10
Cat 2	D	Liver	3	2	3	8
Cat 2	D	Spleen	2	2	2	6
Cat 2	D	Lymph Node	2	2	2	6
Cat 2	D	Kidney	3	2	2	7
Cat 2	D	Brain	3	3	3	9
Cat 2	D	Lung	3	2	3	8
Cat 3	A	Liver	3	3	3	9
Cat 3	A	Spleen	3	3	3	9
Cat 3	A	Lymph Node	0	0	0	0	No node, just fat
Cat 3	A	Kidney	4	3	3	10
Cat 3	A	Brain	4	3	3	10
Cat 3	A	Lung	3	3	3	9
Cat 3	B	Liver	3	3	3	9	Punched out holes
Cat 3	B	Spleen	3	3	3	9	RBC morph poor
Cat 3	B	Lymph Node	3	3	3	9
Cat 3	B	Kidney	3	3	3	9
Cat 3	B	Brain	4	3	3	10
Cat 3	B	Lung	3	2	2	7
Cat 3	C	Liver	3	3	3	9
Cat 3	C	Spleen	3	2	3	8
Cat 3	C	Lymph Node	3	3	3	9
Cat 3	C	Kidney	3	2	3	8
Cat 3	C	Brain	3	2	3	8
Cat 3	C	Lung	2	2	2	6	3+ acid hematin
Cat 3	D	Liver	3	3	3	9	RBC morph poor
Cat 3	D	Spleen	3	2	2	7
Cat 3	D	Lymph Node	3	3	3	9
Cat 3	D	Kidney	3	2	3	8
Cat 3	D	Brain	3	3	3	9
Cat 3	D	Lung	2	2	2	6
Cat 4	A	Liver	3	2	3	8
Cat 4	A	Spleen	3	3	3	9
Cat 4	A	Lymph Node	3	3	3	9
Cat 4	A	Kidney	3	3	3	9
Cat 4	A	Brain	3	3	3	9
Cat 4	A	Lung	3	2	3	8
Cat 4	B	Liver	3	3	3	9
Cat 4	B	Spleen	3	3	3	9
Cat 4	B	Lymph Node	3	3	3	9
Cat 4	B	Kidney	3	3	3	9
Cat 4	B	Brain	3	3	3	9
Cat 4	B	Lung	3	2	3	8
Cat 4	C	Liver	3	2	3	8
Cat 4	C	Spleen	3	2	3	8
Cat 4	C	Lymph Node	3	3	3	9
Cat 4	C	Kidney	3	3	3	9
Cat 4	C	Brain	4	3	3	10
Cat 4	C	Lung	2	2	2	6
Cat 4	D	Liver	3	3	3	9	Punched out holes
Cat 4	D	Spleen	3	2	2	7
Cat 4	D	Lymph Node	3	3	3	9	Punched out holes
Cat 4	D	Kidney	3	3	3	9	Punched out holes
Cat 4	D	Brain	4	3	3	10	Punched out holes
Cat 4	D	Lung	2	2	2	6

## Sheet: Combined
			A					B					C
Animal	Fixative	Tissue	Nuclear	Cytoplasm	Cell Membrane	Sum	Notes	Nuclear	Cytoplasm	Cell Membrane	Sum	Notes	Nuclear	Cytoplasm	Cell Membrane	Sum	Notes
Dog 1	A	Liver	4	3	4	11		4	4	4	12		4	4	4	12
Dog 1	A	Spleen	4	4	4	12		4	4	3	11		4	4	4	12
Dog 1	A	Lymph Node	4	4	4	12		4	4	4	12		4	4	4	12
Dog 1	A	Kidney	4	3	2	9		4	3	3	10		4	4	4	12
Dog 1	A	Brain	3	3	3	9		3	3	3	9		4	4	4	12
Dog 1	A	Lung	4	4	3	11		4	4	3	11		4	4	4	12
Dog 1	B	Liver	4	3	4	11	RBC central lysis	3	3	3	9	ghosting of rbc's in all fixative B sections	3	1	2	6
Dog 1	B	Spleen	3	3	4	10		3	3	3	9		4	1	2	7
Dog 1	B	Lymph Node	4	3	4	11	RBC central lysis	3	3	3	9		4	3	2	9
Dog 1	B	Kidney	4	3	2	9	RBC central lysis	4	3	3	10		4	2	2	8
Dog 1	B	Brain	3	2	3	8	RBC central lysis	2	3	2	7	few holes in section	4	3	3	10
Dog 1	B	Lung	3	2	3	8	RBC central lysis	3	2	2	7		4	1	1	6
Dog 1	C	Liver	4	2	4	10	Severe acid hematin granules	4	3	4	11	ghosting of rbc's in all fixative C sections. Acid hematin	3	2	2	7	4+ acid hematin
Dog 1	C	Spleen	4	3	4	11	Severe acid hematin granules	4	2	2	8	acid hematin	3	2	2	7	4+ acid hematin
Dog 1	C	Lymph Node	4	3	3	10	RBC central lysis	4	3	3	10	chatter	3	3	3	9
Dog 1	C	Kidney	3	3	2	8	RBC central lysis	3	3	2	8		2	2	2	6
Dog 1	C	Brain	3	3	3	9	Holes, RBC central lysis	3	2	2	7	chatter	3	2	2	7	Punched out holes
Dog 1	C	Lung	3	2	2	7	RBC central lysis	3	2	2	7		3	2	1	6
Dog 1	D	Liver	4	2	3	9	RBC central lysis	4	3	3	10	ghosting of rbc's in all fixative D sections. Chatter	3	2	2	7
Dog 1	D	Spleen	3	3	3	9	RBC central lysis	3	2	2	7		3	3	2	8
Dog 1	D	Lymph Node	3	2	3	8		4	3	3	10		3	3	3	9
Dog 1	D	Kidney	3	3	2	8	RBC central lysis	4	3	4	11		3	2	3	8
Dog 1	D	Brain	2	2	3	7	RBC central lysis	3	2	2	7		3	3	3	9
Dog 1	D	Lung	3	2	3	8	RBC central lysis	4	3	3	10		3	2	1	6
Dog 2	A	Liver	4	3	2	9	RBC central lysis	4	3	3	10	chatter	4	4	3	11
Dog 2	A	Spleen	3	3	3	9		4	4	4	12		4	4	4	12
Dog 2	A	Lymph Node	3	3	3	9		4	3	4	11	chatter	4	4	4	12
Dog 2	A	Kidney	3	3	2	8		4	4	3	11		4	4	4	12
Dog 2	A	Brain	3	3	3	9		4	3	3	10		4	4	4	12
Dog 2	A	Lung	4	3	4	11		4	3	3	10		4	4	3	11
Dog 2	B	Liver	2	3	3	8	RBC central lysis	4	3	4	11	ghosting of rbc's in all fixative B sections	3	2	2	7
Dog 2	B	Spleen	3	3	3	9	RBC central lysis	3	3	3	9		3	3	3	9
Dog 2	B	Lymph Node	3	3	3	9		3	3	4	10		3	4	3	10
Dog 2	B	Kidney	3	3	2	8	RBC central lysis	4	4	3	11		3	3	3	9
Dog 2	B	Brain	2	2	2	6		3	3	3	9		3	3	2	8
Dog 2	B	Lung	3	3	4	10	RBC central lysis, individualization of bronchiolar epithelial cells	4	3	4	11		3	3	2	8
Dog 2	C	Liver	4	3	3	10	RBC central lysis, acid hematin formation	4	3	4	11	ghosting of rbc's in all fixative D sections. Acid hematin	3	3	3	9	4+ acid hematin
Dog 2	C	Spleen	3	3	3	9	RBC central lysis, acid hematin formation	4	3	3	10	Acid hematin	3	3	3	9	4+ acid hematin, poorly fixed
Dog 2	C	Lymph Node	4	3	3	10	RBC central lysis	3	3	3	9		3	3	3	9
Dog 2	C	Kidney	4	3	3	10	RBC central lysis	3	3	3	9		3	3	3	9
Dog 2	C	Brain	3	3	3	9	RBC central lysis	3	2	2	7		3	3	3	9
Dog 2	C	Lung	4	1	0	5	RBC central lysis	3	2	2	7		3	2	2	7	Very bloody, not well fixed
Dog 2	D	Liver	3	3	2	8	RBC central lysis	3	3	3	9	ghosting of rbc's in all fixative D sections.	3	3	3	9
Dog 2	D	Spleen	3	3	2	8	RBC central lysis	3	2	2	7		3	2	3	8	Bloody, unfixed
Dog 2	D	Lymph Node	3	2	2	7	RBC central lysis	3	2	3	8	chatter	4	4	3	11
Dog 2	D	Kidney	3	2	3	8	RBC central lysis	3	3	2	8		4	3	4	11
Dog 2	D	Brain	3	2	2	7	RBC central lysis	3	3	3	9		4	3	3	10
Dog 2	D	Lung	3	2	2	7	RBC central lysis	3	3	2	8		3	2	2	7
Cat 1	A	Liver	4	4	4	12		4	4	4	12		4	3	4	11
Cat 1	A	Spleen	4	4	4	12		4	4	4	12		4	3	4	11
Cat 1	A	Lymph Node	4	4	4	12		4	4	4	12		4	3	4	11
Cat 1	A	Kidney	4	3	4	11		4	4	3	11		4	3	4	11
Cat 1	A	Brain	4	4	4	12		4	3	3	10		4	3	4	11
Cat 1	A	Lung	4	4	4	12		4	4	4	12		4	3	4	11
Cat 1	B	Liver	4	3	4	11	RBC central lysis	4	3	4	11	ghosting of rbc's in all fixative B sections	3	3	3	9
Cat 1	B	Spleen	4	3	3	10	Patchy RBC lysis	4	3	3	10	holes	3	2	2	7
Cat 1	B	Lymph Node	4	3	3	10		4	3	3	10		3	2	2	7
Cat 1	B	Kidney	4	3	3	10	Patchy RBC lysis	4	3	3	10		3	3	2	8
Cat 1	B	Brain	4	3	3	10	Holes	4	3	2	9	chatter	3	3	3	9	Punched out holes
Cat 1	B	Lung	4	3	3	10	RBC central lysis	4	3	4	11		2	2	2	6
Cat 1	C	Liver	4	3	4	11	RBC central lysis	4	3	4	11	ghosting of rbc's in all fixative C sections	3	2	3	8
Cat 1	C	Spleen	4	3	3	10	RBC central lysis	4	3	3	10		3	2	2	7
Cat 1	C	Lymph Node	3	3	3	9	RBC central lysis	4	3	3	10		3	2	2	7
Cat 1	C	Kidney	4	3	2	9	RBC central lysis	3	3	2	8		3	2	3	8
Cat 1	C	Brain	3	3	2	8	RBC central lysis	4	3	3	10	chatter	3	3	3	9
Cat 1	C	Lung	3	3	3	9	RBC central lysis	4	4	4	12		3	2	3	8
Cat 1	D	Liver	4	3	3	10	RBC central lysis	4	4	4	12	ghosting of rbc's in all fixative D sections	3	2	2	7
Cat 1	D	Spleen	3	2	2	7	RBC central lysis	4	3	4	11	chatter	3	2	2	7
Cat 1	D	Lymph Node	3	3	3	9	RBC central lysis	4	3	3	10		3	2	2	7
Cat 1	D	Kidney	4	2	3	9	RBC central lysis	4	3	3	10		3	2	2	7
Cat 1	D	Brain	3	4	3	10	Holes, RBC central lysis	3	3	3	9	chatter	3	2	2	7
Cat 1	D	Lung	4	3	4	11	RBC central lysis	4	4	4	12		3	2	3	8
Cat 2	A	Liver	4	3	3	10		4	4	4	12		3	3	3	9
Cat 2	A	Spleen	4	3	3	10		4	4	4	12		3	3	3	9
Cat 2	A	Lymph Node	4	3	3	10		4	4	4	12		3	3	3	9
Cat 2	A	Kidney	3	3	2	8		4	3	3	10		3	2	2	7
Cat 2	A	Brain	3	3	3	9		4	3	3	10	stain precipitate	4	3	3	10
Cat 2	A	Lung	4	4	3	11		4	4	4	12		4	3	4	11
Cat 2	B	Liver	4	4	4	12	RBC central lysis	4	3	4	11	ghosting of rbc's in all fixative B sections/patchy staining of rbc's	3	2	3	8
Cat 2	B	Spleen	4	3	2	9	Patchy RBC lysis	3	3	3	9	holes	3	2	2	7
Cat 2	B	Lymph Node	4	3	3	10	RBC central lysis	4	3	3	10		3	2	2	7
Cat 2	B	Kidney	4	3	3	10	RBC central lysis	4	3	3	10		3	2	2	7
Cat 2	B	Brain	4	3	3	10	RBC central lysis	4	3	3	10	chatter	3	3	3	9
Cat 2	B	Lung	3	3	4	10	RBC central lysis	3	3	4	10		3	2	3	8
Cat 2	C	Liver	4	3	3	10	RBC central lysis, acid hematin formation	4	3	4	11	ghosting of rbc's in all fixative C sections. Acid hematin	3	2	3	8	3+ acid hematin
Cat 2	C	Spleen	4	3	3	10	RBC central lysis, acid hematin formation	3	3	3	9	acid hematin	3	2	2	7	3+ acid hematin
Cat 2	C	Lymph Node	4	3	3	10	RBC central lysis	4	3	3	10		3	2	2	7
Cat 2	C	Kidney	4	3	3	10	RBC central lysis	4	3	3	10		3	2	3	8
Cat 2	C	Brain	4	3	3	10	RBC central lysis	4	3	3	10		3	3	3	9
Cat 2	C	Lung	4	3	2	9	RBC central lysis	4	4	3	11		3	3	4	10
Cat 2	D	Liver	4	3	4	11	RBC central lysis	4	3	3	10	ghosting of rbc's in all fixative D sections	3	2	3	8
Cat 2	D	Spleen	3	2	2	7	RBC central lysis	3	3	3	9		2	2	2	6
Cat 2	D	Lymph Node	4	3	3	10	RBC central lysis	4	3	3	10		2	2	2	6
Cat 2	D	Kidney	4	3	3	10	RBC central lysis	4	3	3	10		3	2	2	7
Cat 2	D	Brain	4	3	3	10	RBC central lysis	4	3	3	10		3	3	3	9
Cat 2	D	Lung	4	4	4	12	RBC central lysis	4	4	4	12		3	2	3	8
Cat 3	A	Liver	4	3	4	11		4	4	4	12		3	3	3	9
Cat 3	A	Spleen	4	3	3	10	Holes	4	4	4	12		3	3	3	9
Cat 3	A	Lymph Node	0	0	0	0	Chipped out				0	no lymph node	0	0	0	0	No node, just fat
Cat 3	A	Kidney	4	4	3	11		4	4	3	11		4	3	3	10
Cat 3	A	Brain	4	4	4	12		4	3	3	10		4	3	3	10
Cat 3	A	Lung	3	3	2	8		3	2	2	7		3	3	3	9
Cat 3	B	Liver	4	4	4	12	Patchy RBC lysis, holes	4	3	4	11	ghosting of rbc's in all fixative B sections Chatter	3	3	3	9	Punched out holes
Cat 3	B	Spleen	4	3	3	10	Patchy central RBC lysis	3	3	3	9	chatter	3	3	3	9	RBC morph poor
Cat 3	B	Lymph Node	4	4	4	12	RBC central lysis	4	3	3	10		3	3	3	9
Cat 3	B	Kidney	3	3	3	9	RBC central lysis, holes	4	4	3	11	chatter	3	3	3	9
Cat 3	B	Brain	4	3	2	9	RBC central lysis	3	3	3	9		4	3	3	10
Cat 3	B	Lung	3	2	2	7	RBC central lysis	2	2	2	6		3	2	2	7
Cat 3	C	Liver	4	4	3	11	RBC central lysis	4	4	4	12	ghosting of rbc's in all fixative C sections. Chatter	3	3	3	9
Cat 3	C	Spleen	4	3	3	10	RBC central lysis	4	3	3	10	chatter acid hematin	3	2	3	8
Cat 3	C	Lymph Node	4	3	3	10	RBC central lysis	4	3	3	10		3	3	3	9
Cat 3	C	Kidney	3	2	2	7	RBC central lysis	4	3	3	10	chatter	3	2	3	8
Cat 3	C	Brain	3	2	2	7	RBC central lysis	4	3	3	10	chatter	3	2	3	8
Cat 3	C	Lung	2	2	2	6	RBC central lysis, acid hematin formation	3	2	2	7	acid hematin	2	2	2	6	3+ acid hematin
Cat 3	D	Liver	3	3	4	10	RBC central lysis, center 50% chipped out	4	3	3	10	ghosting of rbc's in all fixative D sections holes in liver section	3	3	3	9	RBC morph poor
Cat 3	D	Spleen	4	3	3	10	RBC central lysis	4	3	3	10		3	2	2	7
Cat 3	D	Lymph Node	3	3	3	9		4	3	3	10		3	3	3	9
Cat 3	D	Kidney	3	3	3	9	RBC central lysis	4	3	3	10		3	2	3	8
Cat 3	D	Brain	3	3	2	8	RBC central lysis	3	3	3	9		3	3	3	9
Cat 3	D	Lung	2	2	2	6	RBC central lysis	2	2	2	6		2	2	2	6
Cat 4	A	Liver	4	3	2	9		4	4	4	12	chatter	3	2	3	8
Cat 4	A	Spleen	4	4	3	11		3	3	3	9	chatter	3	3	3	9
Cat 4	A	Lymph Node	4	4	3	11		3	3	3	9	chatter	3	3	3	9
Cat 4	A	Kidney	3	3	2	8		3	3	3	9	chatter	3	3	3	9
Cat 4	A	Brain	4	4	4	12		4	3	3	10	staining abnormalities	3	3	3	9
Cat 4	A	Lung	3	3	2	8	Holes	4	3	3	10	hole	3	2	3	8
Cat 4	B	Liver	4	3	4	11	Patchy RBC lysis, holes	4	3	4	11	ghosting of rbc's in all fixative B sections chatter	3	3	3	9
Cat 4	B	Spleen	4	3	3	10	RBC central lysis	3	3	3	9		3	3	3	9
Cat 4	B	Lymph Node	3	3	3	9	Holes	4	3	3	10	chatter	3	3	3	9
Cat 4	B	Kidney	3	4	4	11	RBC central lysis	4	4	3	11		3	3	3	9
Cat 4	B	Brain	3	3	2	8	RBC central lysis	3	3	3	9		3	3	3	9
Cat 4	B	Lung	4	2	2	8	RBC central lysis	2	2	2	6		3	2	3	8
Cat 4	C	Liver	4	4	3	11	RBC central lysis	4	4	4	12	ghosting of rbc's in all fixative C sections	3	2	3	8
Cat 4	C	Spleen	4	3	3	10	RBC central lysis	3	3	3	9	acid hematin chatter	3	2	3	8
Cat 4	C	Lymph Node	4	3	3	10	RBC central lysis	3	3	3	9		3	3	3	9
Cat 4	C	Kidney	3	3	2	8	RBC central lysis	3	3	3	9		3	3	3	9
Cat 4	C	Brain	3	2	2	7	RBC central lysis	3	3	3	9		4	3	3	10
Cat 4	C	Lung	3	4	4	11	RBC central lysis	2	2	2	6		2	2	2	6
Cat 4	D	Liver	3	3	3	9	RBC central lysis, holes	4	3	3	10	ghosting of rbc's in all fixative D sections chatter	3	3	3	9	Punched out holes
Cat 4	D	Spleen	3	3	3	9	RBC central lysis	4	3	3	10		3	2	2	7
Cat 4	D	Lymph Node	3	3	3	9	RBC central lysis, holes	3	3	3	9	chatter	3	3	3	9	Punched out holes
Cat 4	D	Kidney	3	3	2	8	RBC central lysis, holes	3	3	3	9	chatter	3	3	3	9	Punched out holes
Cat 4	D	Brain	4	3	2	9	RBC central lysis, holes	3	3	3	9		4	3	3	10	Punched out holes
Cat 4	D	Lung	3	3	4	10	RBC central lysis	3	3	3	9	acid hematin	2	2	2	6

## Sheet: Averages
			Nuclear		Cytoplasm		Cell Membrane		Sum		Notes
Animal	Fixative	Tissue	Mean	SD	Mean	SD	Mean	SD	Mean	SD
Dog 1	A	Liver	4	0	3.66667	0.57735	4	0	11.6667	0.57735	A: B: C:
Dog 1	A	Spleen	4	0	4	0	3.66667	0.57735	11.6667	0.57735	A: B: C:
Dog 1	A	Lymph Node	4	0	4	0	4	0	12	0	A: B: C:
Dog 1	A	Kidney	4	0	3.33333	0.57735	3	1	10.3333	1.52753	A: B: C:
Dog 1	A	Brain	3.33333	0.57735	3.33333	0.57735	3.33333	0.57735	10	1.73205	A: B: C:
Dog 1	A	Lung	4	0	4	0	3.33333	0.57735	11.3333	0.57735	A: B: C:
Dog 1	B	Liver	3.33333	0.57735	2.33333	1.1547	3	1	8.66667	2.51661	A:RBC central lysis B: ghosting of rbc's in all fixative B sections C:
Dog 1	B	Spleen	3.33333	0.57735	2.33333	1.1547	3	1	8.66667	1.52753	A: B: C:
Dog 1	B	Lymph Node	3.66667	0.57735	3	0	3	1	9.66667	1.1547	A:RBC central lysis B: C:
Dog 1	B	Kidney	4	0	2.66667	0.57735	2.33333	0.57735	9	1	A:RBC central lysis B: C:
Dog 1	B	Brain	3	1	2.66667	0.57735	2.66667	0.57735	8.33333	1.52753	A:RBC central lysis B: few holes in section C:
Dog 1	B	Lung	3.33333	0.57735	1.66667	0.57735	2	1	7	1	A:RBC central lysis B: C:
Dog 1	C	Liver	3.66667	0.57735	2.33333	0.57735	3.33333	1.1547	9.33333	2.08167	A:Severe acid hematin granules B: ghosting of rbc's in all fixative C sections. Acid hematin C: 4+ acid hematin
Dog 1	C	Spleen	3.66667	0.57735	2.33333	0.57735	2.66667	1.1547	8.66667	2.08167	A:Severe acid hematin granules B: acid hematin C: 4+ acid hematin
Dog 1	C	Lymph Node	3.66667	0.57735	3	0	3	0	9.66667	0.57735	A:RBC central lysis B: chatter C:
Dog 1	C	Kidney	2.66667	0.57735	2.66667	0.57735	2	0	7.33333	1.1547	A:RBC central lysis B: C:
Dog 1	C	Brain	3	0	2.33333	0.57735	2.33333	0.57735	7.66667	1.1547	A:Holes, RBC central lysis B: chatter C: Punched out holes
Dog 1	C	Lung	3	0	2	0	1.66667	0.57735	6.66667	0.57735	A:RBC central lysis B: C:
Dog 1	D	Liver	3.66667	0.57735	2.33333	0.57735	2.66667	0.57735	8.66667	1.52753	A:RBC central lysis B: ghosting of rbc's in all fixative D sections. Chatter C:
Dog 1	D	Spleen	3	0	2.66667	0.57735	2.33333	0.57735	8	1	A:RBC central lysis B: C:
Dog 1	D	Lymph Node	3.33333	0.57735	2.66667	0.57735	3	0	9	1	A: B: C:
Dog 1	D	Kidney	3.33333	0.57735	2.66667	0.57735	3	1	9	1.73205	A:RBC central lysis B: C:
Dog 1	D	Brain	2.66667	0.57735	2.33333	0.57735	2.66667	0.57735	7.66667	1.1547	A:RBC central lysis B: C:
Dog 1	D	Lung	3.33333	0.57735	2.33333	0.57735	2.33333	1.1547	8	2	A:RBC central lysis B: C:
Dog 2	A	Liver	4	0	3.33333	0.57735	2.66667	0.57735	10	1	A:RBC central lysis B: chatter C:
Dog 2	A	Spleen	3.66667	0.57735	3.66667	0.57735	3.66667	0.57735	11	1.73205	A: B: C:
Dog 2	A	Lymph Node	3.66667	0.57735	3.33333	0.57735	3.66667	0.57735	10.6667	1.52753	A: B: chatter C:
Dog 2	A	Kidney	3.66667	0.57735	3.66667	0.57735	3	1	10.3333	2.08167	A: B: C:
Dog 2	A	Brain	3.66667	0.57735	3.33333	0.57735	3.33333	0.57735	10.3333	1.52753	A: B: C:
Dog 2	A	Lung	4	0	3.33333	0.57735	3.33333	0.57735	10.6667	0.57735	A: B: C:
Dog 2	B	Liver	3	1	2.66667	0.57735	3	1	8.66667	2.08167	A:RBC central lysis B: ghosting of rbc's in all fixative B sections C:
Dog 2	B	Spleen	3	0	3	0	3	0	9	0	A:RBC central lysis B: C:
Dog 2	B	Lymph Node	3	0	3.33333	0.57735	3.33333	0.57735	9.66667	0.57735	A: B: C:
Dog 2	B	Kidney	3.33333	0.57735	3.33333	0.57735	2.66667	0.57735	9.33333	1.52753	A:RBC central lysis B: C:
Dog 2	B	Brain	2.66667	0.57735	2.66667	0.57735	2.33333	0.57735	7.66667	1.52753	A: B: C:
Dog 2	B	Lung	3.33333	0.57735	3	0	3.33333	1.1547	9.66667	1.52753	A:RBC central lysis, individualization of bronchiolar epithelial cells B: C:
Dog 2	C	Liver	3.66667	0.57735	3	0	3.33333	0.57735	10	1	A:RBC central lysis, acid hematin formation B: ghosting of rbc's in all fixative D sections. Acid hematin C: 4+ acid hematin
Dog 2	C	Spleen	3.33333	0.57735	3	0	3	0	9.33333	0.57735	A:RBC central lysis, acid hematin formation B: Acid hematin C: 4+ acid hematin, poorly fixed
Dog 2	C	Lymph Node	3.33333	0.57735	3	0	3	0	9.33333	0.57735	A:RBC central lysis B: C:
Dog 2	C	Kidney	3.33333	0.57735	3	0	3	0	9.33333	0.57735	A:RBC central lysis B: C:
Dog 2	C	Brain	3	0	2.66667	0.57735	2.66667	0.57735	8.33333	1.1547	A:RBC central lysis B: C:
Dog 2	C	Lung	3.33333	0.57735	1.66667	0.57735	1.33333	1.1547	6.33333	1.1547	A:RBC central lysis B: C: Very bloody, not well fixed
Dog 2	D	Liver	3	0	3	0	2.66667	0.57735	8.66667	0.57735	A:RBC central lysis B: ghosting of rbc's in all fixative D sections. C:
Dog 2	D	Spleen	3	0	2.33333	0.57735	2.33333	0.57735	7.66667	0.57735	A:RBC central lysis B: C: Bloody, unfixed
Dog 2	D	Lymph Node	3.33333	0.57735	2.66667	1.1547	2.66667	0.57735	8.66667	2.08167	A:RBC central lysis B: chatter C:
Dog 2	D	Kidney	3.33333	0.57735	2.66667	0.57735	3	1	9	1.73205	A:RBC central lysis B: C:
Dog 2	D	Brain	3.33333	0.57735	2.66667	0.57735	2.66667	0.57735	8.66667	1.52753	A:RBC central lysis B: C:
Dog 2	D	Lung	3	0	2.33333	0.57735	2	0	7.33333	0.57735	A:RBC central lysis B: C:
Cat 1	A	Liver	4	0	3.66667	0.57735	4	0	11.6667	0.57735	A: B: C:
Cat 1	A	Spleen	4	0	3.66667	0.57735	4	0	11.6667	0.57735	A: B: C:
Cat 1	A	Lymph Node	4	0	3.66667	0.57735	4	0	11.6667	0.57735	A: B: C:
Cat 1	A	Kidney	4	0	3.33333	0.57735	3.66667	0.57735	11	0	A: B: C:
Cat 1	A	Brain	4	0	3.33333	0.57735	3.66667	0.57735	11	1	A: B: C:
Cat 1	A	Lung	4	0	3.66667	0.57735	4	0	11.6667	0.57735	A: B: C:
Cat 1	B	Liver	3.66667	0.57735	3	0	3.66667	0.57735	10.3333	1.1547	A:RBC central lysis B: ghosting of rbc's in all fixative B sections C:
Cat 1	B	Spleen	3.66667	0.57735	2.66667	0.57735	2.66667	0.57735	9	1.73205	A:Patchy RBC lysis B: holes C:
Cat 1	B	Lymph Node	3.66667	0.57735	2.66667	0.57735	2.66667	0.57735	9	1.73205	A: B: C:
Cat 1	B	Kidney	3.66667	0.57735	3	0	2.66667	0.57735	9.33333	1.1547	A:Patchy RBC lysis B: C:
Cat 1	B	Brain	3.66667	0.57735	3	0	2.66667	0.57735	9.33333	0.57735	A:Holes B: chatter C: Punched out holes
Cat 1	B	Lung	3.33333	1.1547	2.66667	0.57735	3	1	9	2.64575	A:RBC central lysis B: C:
Cat 1	C	Liver	3.66667	0.57735	2.66667	0.57735	3.66667	0.57735	10	1.73205	A:RBC central lysis B: ghosting of rbc's in all fixative C sections C:
Cat 1	C	Spleen	3.66667	0.57735	2.66667	0.57735	2.66667	0.57735	9	1.73205	A:RBC central lysis B: C:
Cat 1	C	Lymph Node	3.33333	0.57735	2.66667	0.57735	2.66667	0.57735	8.66667	1.52753	A:RBC central lysis B: C:
Cat 1	C	Kidney	3.33333	0.57735	2.66667	0.57735	2.33333	0.57735	8.33333	0.57735	A:RBC central lysis B: C:
Cat 1	C	Brain	3.33333	0.57735	3	0	2.66667	0.57735	9	1	A:RBC central lysis B: chatter C:
Cat 1	C	Lung	3.33333	0.57735	3	1	3.33333	0.57735	9.66667	2.08167	A:RBC central lysis B: C:
Cat 1	D	Liver	3.66667	0.57735	3	1	3	1	9.66667	2.51661	A:RBC central lysis B: ghosting of rbc's in all fixative D sections C:
Cat 1	D	Spleen	3.33333	0.57735	2.33333	0.57735	2.66667	1.1547	8.33333	2.3094	A:RBC central lysis B: chatter C:
Cat 1	D	Lymph Node	3.33333	0.57735	2.66667	0.57735	2.66667	0.57735	8.66667	1.52753	A:RBC central lysis B: C:
Cat 1	D	Kidney	3.66667	0.57735	2.33333	0.57735	2.66667	0.57735	8.66667	1.52753	A:RBC central lysis B: C:
Cat 1	D	Brain	3	0	3	1	2.66667	0.57735	8.66667	1.52753	A:Holes, RBC central lysis B: chatter C:
Cat 1	D	Lung	3.66667	0.57735	3	1	3.66667	0.57735	10.3333	2.08167	A:RBC central lysis B: C:
Cat 2	A	Liver	3.66667	0.57735	3.33333	0.57735	3.33333	0.57735	10.3333	1.52753	A: B: C:
Cat 2	A	Spleen	3.66667	0.57735	3.33333	0.57735	3.33333	0.57735	10.3333	1.52753	A: B: C:
Cat 2	A	Lymph Node	3.66667	0.57735	3.33333	0.57735	3.33333	0.57735	10.3333	1.52753	A: B: C:
Cat 2	A	Kidney	3.33333	0.57735	2.66667	0.57735	2.33333	0.57735	8.33333	1.52753	A: B: C:
Cat 2	A	Brain	3.66667	0.57735	3	0	3	0	9.66667	0.57735	A: B: stain precipitate C:
Cat 2	A	Lung	4	0	3.66667	0.57735	3.66667	0.57735	11.3333	0.57735	A: B: C:
Cat 2	B	Liver	3.66667	0.57735	3	1	3.66667	0.57735	10.3333	2.08167	A:RBC central lysis B: ghosting of rbc's in all fixative B sections/patchy staining of rbc's C:
Cat 2	B	Spleen	3.33333	0.57735	2.66667	0.57735	2.33333	0.57735	8.33333	1.1547	A:Patchy RBC lysis B: holes C:
Cat 2	B	Lymph Node	3.66667	0.57735	2.66667	0.57735	2.66667	0.57735	9	1.73205	A:RBC central lysis B: C:
Cat 2	B	Kidney	3.66667	0.57735	2.66667	0.57735	2.66667	0.57735	9	1.73205	A:RBC central lysis B: C:
Cat 2	B	Brain	3.66667	0.57735	3	0	3	0	9.66667	0.57735	A:RBC central lysis B: chatter C:
Cat 2	B	Lung	3	0	2.66667	0.57735	3.66667	0.57735	9.33333	1.1547	A:RBC central lysis B: C:
Cat 2	C	Liver	3.66667	0.57735	2.66667	0.57735	3.33333	0.57735	9.66667	1.52753	A:RBC central lysis, acid hematin formation B: ghosting of rbc's in all fixative C sections. Acid hematin C: 3+ acid hematin
Cat 2	C	Spleen	3.33333	0.57735	2.66667	0.57735	2.66667	0.57735	8.66667	1.52753	A:RBC central lysis, acid hematin formation B: acid hematin C: 3+ acid hematin
Cat 2	C	Lymph Node	3.66667	0.57735	2.66667	0.57735	2.66667	0.57735	9	1.73205	A:RBC central lysis B: C:
Cat 2	C	Kidney	3.66667	0.57735	2.66667	0.57735	3	0	9.33333	1.1547	A:RBC central lysis B: C:
Cat 2	C	Brain	3.66667	0.57735	3	0	3	0	9.66667	0.57735	A:RBC central lysis B: C:
Cat 2	C	Lung	3.66667	0.57735	3.33333	0.57735	3	1	10	1	A:RBC central lysis B: C:
Cat 2	D	Liver	3.66667	0.57735	2.66667	0.57735	3.33333	0.57735	9.66667	1.52753	A:RBC central lysis B: ghosting of rbc's in all fixative D sections C:
Cat 2	D	Spleen	2.66667	0.57735	2.33333	0.57735	2.33333	0.57735	7.33333	1.52753	A:RBC central lysis B: C:
Cat 2	D	Lymph Node	3.33333	1.1547	2.66667	0.57735	2.66667	0.57735	8.66667	2.3094	A:RBC central lysis B: C:
Cat 2	D	Kidney	3.66667	0.57735	2.66667	0.57735	2.66667	0.57735	9	1.73205	A:RBC central lysis B: C:
Cat 2	D	Brain	3.66667	0.57735	3	0	3	0	9.66667	0.57735	A:RBC central lysis B: C:
Cat 2	D	Lung	3.66667	0.57735	3.33333	1.1547	3.66667	0.57735	10.6667	2.3094	A:RBC central lysis B: C:
Cat 3	A	Liver	3.66667	0.57735	3.33333	0.57735	3.66667	0.57735	10.6667	1.52753	A: B: C:
Cat 3	A	Spleen	3.66667	0.57735	3.33333	0.57735	3.33333	0.57735	10.3333	1.52753	A:Holes B: C:
Cat 3	A	Lymph Node	0	0	0	0	0	0	0	0	A:Chipped out B: no lymph node C: No node, just fat
Cat 3	A	Kidney	4	0	3.66667	0.57735	3	0	10.6667	0.57735	A: B: C:
Cat 3	A	Brain	4	0	3.33333	0.57735	3.33333	0.57735	10.6667	1.1547	A: B: C:
Cat 3	A	Lung	3	0	2.66667	0.57735	2.33333	0.57735	8	1	A: B: C:
Cat 3	B	Liver	3.66667	0.57735	3.33333	0.57735	3.66667	0.57735	10.6667	1.52753	A:Patchy RBC lysis, holes B: ghosting of rbc's in all fixative B sections Chatter C: Punched out holes
Cat 3	B	Spleen	3.33333	0.57735	3	0	3	0	9.33333	0.57735	A:Patchy central RBC lysis B: chatter C: RBC morph poor
Cat 3	B	Lymph Node	3.66667	0.57735	3.33333	0.57735	3.33333	0.57735	10.3333	1.52753	A:RBC central lysis B: C:
Cat 3	B	Kidney	3.33333	0.57735	3.33333	0.57735	3	0	9.66667	1.1547	A:RBC central lysis, holes B: chatter C:
Cat 3	B	Brain	3.66667	0.57735	3	0	2.66667	0.57735	9.33333	0.57735	A:RBC central lysis B: C:
Cat 3	B	Lung	2.66667	0.57735	2	0	2	0	6.66667	0.57735	A:RBC central lysis B: C:
Cat 3	C	Liver	3.66667	0.57735	3.66667	0.57735	3.33333	0.57735	10.6667	1.52753	A:RBC central lysis B: ghosting of rbc's in all fixative C sections. Chatter C:
Cat 3	C	Spleen	3.66667	0.57735	2.66667	0.57735	3	0	9.33333	1.1547	A:RBC central lysis B: chatter acid hematin C:
Cat 3	C	Lymph Node	3.66667	0.57735	3	0	3	0	9.66667	0.57735	A:RBC central lysis B: C:
Cat 3	C	Kidney	3.33333	0.57735	2.33333	0.57735	2.66667	0.57735	8.33333	1.52753	A:RBC central lysis B: chatter C:
Cat 3	C	Brain	3.33333	0.57735	2.33333	0.57735	2.66667	0.57735	8.33333	1.52753	A:RBC central lysis B: chatter C:
Cat 3	C	Lung	2.33333	0.57735	2	0	2	0	6.33333	0.57735	A:RBC central lysis, acid hematin formation B: acid hematin C: 3+ acid hematin
Cat 3	D	Liver	3.33333	0.57735	3	0	3.33333	0.57735	9.66667	0.57735	A:RBC central lysis, center 50% chipped out B: ghosting of rbc's in all fixative D sections holes in liver section C: RBC morph poor
Cat 3	D	Spleen	3.66667	0.57735	2.66667	0.57735	2.66667	0.57735	9	1.73205	A:RBC central lysis B: C:
Cat 3	D	Lymph Node	3.33333	0.57735	3	0	3	0	9.33333	0.57735	A: B: C:
Cat 3	D	Kidney	3.33333	0.57735	2.66667	0.57735	3	0	9	1	A:RBC central lysis B: C:
Cat 3	D	Brain	3	0	3	0	2.66667	0.57735	8.66667	0.57735	A:RBC central lysis B: C:
Cat 3	D	Lung	2	0	2	0	2	0	6	0	A:RBC central lysis B: C:
Cat 4	A	Liver	3.66667	0.57735	3	1	3	1	9.66667	2.08167	A: B: chatter C:
Cat 4	A	Spleen	3.33333	0.57735	3.33333	0.57735	3	0	9.66667	1.1547	A: B: chatter C:
Cat 4	A	Lymph Node	3.33333	0.57735	3.33333	0.57735	3	0	9.66667	1.1547	A: B: chatter C:
Cat 4	A	Kidney	3	0	3	0	2.66667	0.57735	8.66667	0.57735	A: B: chatter C:
Cat 4	A	Brain	3.66667	0.57735	3.33333	0.57735	3.33333	0.57735	10.3333	1.52753	A: B: staining abnormalities C:
Cat 4	A	Lung	3.33333	0.57735	2.66667	0.57735	2.66667	0.57735	8.66667	1.1547	A:Holes B: hole C:
Cat 4	B	Liver	3.66667	0.57735	3	0	3.66667	0.57735	10.3333	1.1547	A:Patchy RBC lysis, holes B: ghosting of rbc's in all fixative B sections chatter C:
Cat 4	B	Spleen	3.33333	0.57735	3	0	3	0	9.33333	0.57735	A:RBC central lysis B: C:
Cat 4	B	Lymph Node	3.33333	0.57735	3	0	3	0	9.33333	0.57735	A:Holes B: chatter C:
Cat 4	B	Kidney	3.33333	0.57735	3.66667	0.57735	3.33333	0.57735	10.3333	1.1547	A:RBC central lysis B: C:
Cat 4	B	Brain	3	0	3	0	2.66667	0.57735	8.66667	0.57735	A:RBC central lysis B: C:
Cat 4	B	Lung	3	1	2	0	2.33333	0.57735	7.33333	1.1547	A:RBC central lysis B: C:
Cat 4	C	Liver	3.66667	0.57735	3.33333	1.1547	3.33333	0.57735	10.3333	2.08167	A:RBC central lysis B: ghosting of rbc's in all fixative C sections C:
Cat 4	C	Spleen	3.33333	0.57735	2.66667	0.57735	3	0	9	1	A:RBC central lysis B: acid hematin chatter C:
Cat 4	C	Lymph Node	3.33333	0.57735	3	0	3	0	9.33333	0.57735	A:RBC central lysis B: C:
Cat 4	C	Kidney	3	0	3	0	2.66667	0.57735	8.66667	0.57735	A:RBC central lysis B: C:
Cat 4	C	Brain	3.33333	0.57735	2.66667	0.57735	2.66667	0.57735	8.66667	1.52753	A:RBC central lysis B: C:
Cat 4	C	Lung	2.33333	0.57735	2.66667	1.1547	2.66667	1.1547	7.66667	2.88675	A:RBC central lysis B: C:
Cat 4	D	Liver	3.33333	0.57735	3	0	3	0	9.33333	0.57735	A:RBC central lysis, holes B: ghosting of rbc's in all fixative D sections chatter C: Punched out holes
Cat 4	D	Spleen	3.33333	0.57735	2.66667	0.57735	2.66667	0.57735	8.66667	1.52753	A:RBC central lysis B: C:
Cat 4	D	Lymph Node	3	0	3	0	3	0	9	0	A:RBC central lysis, holes B: chatter C: Punched out holes
Cat 4	D	Kidney	3	0	3	0	2.66667	0.57735	8.66667	0.57735	A:RBC central lysis, holes B: chatter C: Punched out holes
Cat 4	D	Brain	3.66667	0.57735	3	0	2.66667	0.57735	9.33333	0.57735	A:RBC central lysis, holes B: C: Punched out holes
Cat 4	D	Lung	2.66667	0.57735	2.66667	0.57735	3	1	8.33333	2.08167	A:RBC central lysis B: acid hematin C:

## Sheet: Combined_Animals
			Nuclear		Cytoplasm		Cell Membrane		Sum
			Mean	SD	Mean	SD	Mean	SD	Mean	SD
Dog	A	Liver	4	0	3.5	0.547723	3.33333	0.816497	10.8333	1.16905
Dog	A	Spleen	3.83333	0.408248	3.83333	0.408248	3.66667	0.516398	11.3333	1.21106
Dog	A	Lymph Node	3.83333	0.408248	3.66667	0.516398	3.83333	0.408248	11.3333	1.21106
Dog	A	Kidney	3.83333	0.408248	3.5	0.547723	3	0.894427	10.3333	1.63299
Dog	A	Brain	3.5	0.547723	3.33333	0.516398	3.33333	0.516398	10.1667	1.47196
Dog	A	Lung	4	0	3.66667	0.516398	3.33333	0.516398	11	0.632456
Dog	B	Liver	3.16667	0.752773	2.5	0.83666	3	0.894427	8.66667	2.06559
Dog	B	Spleen	3.16667	0.408248	2.66667	0.816497	3	0.632456	8.83333	0.983192
Dog	B	Lymph Node	3.33333	0.516398	3.16667	0.408248	3.16667	0.752773	9.66667	0.816497
Dog	B	Kidney	3.66667	0.516398	3	0.632456	2.5	0.547723	9.16667	1.16905
Dog	B	Brain	2.83333	0.752773	2.66667	0.516398	2.5	0.547723	8	1.41421
Dog	B	Lung	3.33333	0.516398	2.33333	0.816497	2.66667	1.21106	8.33333	1.8619
Dog	C	Liver	3.66667	0.516398	2.66667	0.516398	3.33333	0.816497	9.66667	1.50555
Dog	C	Spleen	3.5	0.547723	2.66667	0.516398	2.83333	0.752773	9	1.41421
Dog	C	Lymph Node	3.5	0.547723	3	0	3	0	9.5	0.547723
Dog	C	Kidney	3	0.632456	2.83333	0.408248	2.5	0.547723	8.33333	1.36626
Dog	C	Brain	3	0	2.5	0.547723	2.5	0.547723	8	1.09545
Dog	C	Lung	3.16667	0.408248	1.83333	0.408248	1.5	0.83666	6.5	0.83666
Dog	D	Liver	3.33333	0.516398	2.66667	0.516398	2.66667	0.516398	8.66667	1.0328
Dog	D	Spleen	3	0	2.5	0.547723	2.33333	0.516398	7.83333	0.752773
Dog	D	Lymph Node	3.33333	0.516398	2.66667	0.816497	2.83333	0.408248	8.83333	1.47196
Dog	D	Kidney	3.33333	0.516398	2.66667	0.516398	3	0.894427	9	1.54919
Dog	D	Brain	3	0.632456	2.5	0.547723	2.66667	0.516398	8.16667	1.32916
Dog	D	Lung	3.16667	0.408248	2.33333	0.516398	2.16667	0.752773	7.66667	1.36626
Cat	A	Liver	3.83333	0.389249	3.41667	0.514929	3.41667	0.792961	10.6667	1.37069
Cat	A	Spleen	3.75	0.452267	3.5	0.522233	3.41667	0.514929	10.6667	1.23091
Cat	A	Lymph Node	3.09091	1.57826	2.90909	1.51357	2.81818	1.47093	8.08333	4.98102
Cat	A	Kidney	3.58333	0.514929	3.16667	0.57735	2.83333	0.717741	9.58333	1.50504
Cat	A	Brain	3.91667	0.288675	3.33333	0.492366	3.41667	0.514929	10.6667	1.07309
Cat	A	Lung	3.58333	0.514929	3.25	0.621582	3.08333	0.900337	9.91667	1.83196
Cat	B	Liver	3.75	0.452267	3.08333	0.514929	3.75	0.452267	10.5833	1.24011
Cat	B	Spleen	3.5	0.522233	2.83333	0.389249	2.75	0.452267	9.08333	1.08362
Cat	B	Lymph Node	3.58333	0.514929	2.91667	0.514929	2.91667	0.514929	9.41667	1.37895
Cat	B	Kidney	3.5	0.522233	3.25	0.621582	3	0.603023	9.75	1.28806
Cat	B	Brain	3.5	0.522233	3	0	2.66667	0.492366	9.16667	0.717741
Cat	B	Lung	3.08333	0.792961	2.33333	0.492366	2.66667	0.887625	8.08333	1.78164
Cat	C	Liver	3.75	0.452267	3.25	0.753778	3.41667	0.514929	10.4167	1.37895
Cat	C	Spleen	3.58333	0.514929	2.75	0.452267	2.83333	0.389249	9.16667	1.19342
Cat	C	Lymph Node	3.58333	0.514929	2.83333	0.389249	2.83333	0.389249	9.25	1.13818
Cat	C	Kidney	3.33333	0.492366	2.66667	0.492366	2.58333	0.514929	8.58333	0.996205
Cat	C	Brain	3.33333	0.492366	2.66667	0.492366	2.66667	0.492366	8.66667	1.23091
Cat	C	Lung	3	0.738549	2.91667	0.900337	2.91667	0.900337	8.83333	2.2088
Cat	D	Liver	3.5	0.522233	2.91667	0.514929	3.16667	0.57735	9.58333	1.31137
Cat	D	Spleen	3.25	0.621582	2.58333	0.514929	2.66667	0.651339	8.5	1.62369
Cat	D	Lymph Node	3.25	0.621582	2.83333	0.389249	2.83333	0.389249	8.91667	1.24011
Cat	D	Kidney	3.41667	0.514929	2.66667	0.492366	2.66667	0.492366	8.75	1.13818
Cat	D	Brain	3.33333	0.492366	3	0.426401	2.66667	0.492366	9	0.852803
Cat	D	Lung	3.08333	0.792961	2.83333	0.834847	3.25	0.866025	9.16667	2.36771

## Sheet: Fixatives_combined
		Nuclear		Cytoplasm		Cell Membrane		Sum
		Mean	SD	Mean	SD	Mean	SD	Mean	SD
A	Liver	3.83333	0.383482	3.38889	0.607685	3.44444	0.704792	10.6667	1.37199
A	Spleen	3.72222	0.460889	3.55556	0.51131	3.5	0.514496	10.7778	1.30859
A	Lymph Node	3.29412	1.31171	3.11765	1.26897	3.17647	1.28624	9.05556	4.33145
A	Kidney	3.66667	0.485071	3.27778	0.574513	2.94444	0.725358	9.88889	1.49071
A	Brain	3.72222	0.460889	3.27778	0.460889	3.33333	0.485071	10.3333	1.18818
A	Lung	3.72222	0.460889	3.33333	0.685994	3.22222	0.732084	10.2778	1.60167
B	Liver	3.5	0.618347	2.88889	0.6764	3.44444	0.704792	9.83333	1.75734
B	Spleen	3.33333	0.485071	2.77778	0.548319	2.83333	0.514496	8.94444	0.998365
B	Lymph Node	3.5	0.514496	3	0.485071	3	0.594089	9.5	1.20049
B	Kidney	3.55556	0.51131	3.11111	0.582983	2.77778	0.548319	9.44444	1.19913
B	Brain	3.27778	0.669113	2.88889	0.323381	2.66667	0.485071	8.83333	1.09813
B	Lung	3.11111	0.6764	2.33333	0.594089	2.72222	0.95828	8.16667	1.75734
C	Liver	3.66667	0.485071	2.94444	0.725358	3.38889	0.607685	10	1.49509
C	Spleen	3.5	0.514496	2.66667	0.485071	2.83333	0.514496	9	1.23669
C	Lymph Node	3.5	0.514496	2.88889	0.323381	2.88889	0.323381	9.27778	0.95828
C	Kidney	3.22222	0.548319	2.72222	0.460889	2.61111	0.501631	8.55556	1.09664
C	Brain	3.27778	0.460889	2.66667	0.485071	2.66667	0.485071	8.61111	1.19503
C	Lung	3	0.685994	2.44444	0.855585	2.33333	1.02899	7.77778	2.0738
D	Liver	3.44444	0.51131	2.83333	0.514496	3	0.594089	9.27778	1.27443
D	Spleen	3.16667	0.514496	2.5	0.514496	2.5	0.618347	8.16667	1.42457
D	Lymph Node	3.27778	0.574513	2.77778	0.548319	2.83333	0.383482	8.88889	1.27827
D	Kidney	3.38889	0.501631	2.66667	0.485071	2.83333	0.618347	8.88889	1.2314
D	Brain	3.22222	0.548319	2.83333	0.514496	2.72222	0.460889	8.77778	1.11437
D	Lung	3.05556	0.725358	2.61111	0.777544	2.77778	0.942809	8.44444	2.22875

## Sheet: Fixatives_all_combined
	Nuclear		Cytoplasm		Cell Membrane		Sum
	Mean	SD	Mean	SD	Mean	SD	Mean	SD
A	3.66355	0.67214	3.3271	0.723927	3.27103	0.78392	10.1667	2.20662
B	3.37963	0.591491	2.83333	0.588043	2.90741	0.690889	9.12037	1.44505
C	3.36111	0.571248	2.72222	0.593317	2.78704	0.684282	8.87037	1.52299
D	3.25926	0.569807	2.7037	0.567981	2.77778	0.63147	8.74074	1.48116
